# The Complete Mitochondrial Genome and Novel Gene Arrangement of the Unique-Headed Bug *Stenopirates* sp. (Hemiptera: Enicocephalidae)

Hu Li<sup>1</sup>, Hui Liu<sup>2</sup>, Aimin Shi<sup>1</sup>, Pavel Štys<sup>3</sup>, Xuguo Zhou<sup>4\*</sup>, Wanzhi Cai<sup>1\*</sup>

**1** Department of Entomology, China Agricultural University, Beijing, China, **2** Entomological Laboratory, Graduate School of Bioresource and Bioenvironmental Sciences, Kyushu University, Fukuoka, Japan, **3** Department of Zoology, Faculty of Science, Charles University, Praha, Czech Republic, **4** Department of Entomology, University of Kentucky, Lexington, Kentucky, United States of America

## Abstract

Many of true bugs are important insect pests to cultivated crops and some are important vectors of human diseases, but few cladistic analyses have addressed relationships among the seven infraorders of Heteroptera. The Enicocephalomorpha and Nepomorpha are considered the basal groups of Heteroptera, but the basal-most lineage remains unresolved. Here we report the mitochondrial genome of the unique-headed bug *Stenopirates* sp., the first mitochondrial genome sequenced from Enicocephalomorpha. The *Stenopirates* sp. mitochondrial genome is a typical circular DNA molecule of 15,384 bp in length, and contains 37 genes and a large non-coding fragment. The gene order differs substantially from other known insect mitochondrial genomes, with rearrangements of both tRNA genes and protein-coding genes. The overall AT content (82.5%) of *Stenopirates* sp. is the highest among all the known heteropteran mitochondrial genomes. The strand bias is consistent with other true bugs with negative GC-skew and positive AT-skew for the J-strand. The heteropteran mitochondrial *atp8* exhibits the highest evolutionary rate, whereas *cox1* appears to have the lowest rate. Furthermore, a negative correlation was observed between the variation of nucleotide substitutions and the GC content of each protein-coding gene. A microsatellite was identified in the putative control region. Finally, phylogenetic reconstruction suggests that Enicocephalomorpha is the sister group to all the remaining Heteroptera.

**Citation:** Li H, Liu H, Shi A, Štys P, Zhou X, et al. (2012) The Complete Mitochondrial Genome and Novel Gene Arrangement of the Unique-Headed Bug *Stenopirates* sp. (Hemiptera: Enicocephalidae). PLoS ONE 7(1): e29419. doi:10.1371/journal.pone.0029419

**Editor:** Nikolas Nikolaidis, California State University Fullerton, United States of America

**Received:** September 26, 2011; **Accepted:** November 28, 2011; **Published:** January 3, 2012

**Copyright:** © 2012 Li et al. This is an open-access article distributed under the terms of the Creative Commons Attribution License, which permits unrestricted use, distribution, and reproduction in any medium, provided the original author and source are credited.

**Funding:** This study was supported by grants from the National Natural Science Foundation of China (Nos. 30825006, 30970394, 31061160186), Beijing Natural Science Foundation (No. 6112013), the Doctoral Program of Higher Education of China (No. 200800190015), the Key Laboratory of the Zoological Systematics and Evolution of the Chinese Academy of Sciences (No. O529YX5105) to Wanzhi Cai, the Innovation Program for Ph.D. Students of China Agricultural University (No. 15059211) to Hu Li and Grant Agency of Czech Academy of Sciences (IAA. 601110706) to Pavel Štys. The funders had no role in study design, data collection and analysis, decision to publish, or preparation of the manuscript.

**Competing Interests:** The authors have declared that no competing interests exist.

\* E-mail: caiwz@cau.edu.cn (WC); xuguozhou@uky.edu (XZ)

## Introduction

Mitochondrial (mt) genome sequences are becoming increasingly important for comprehensive evolutionary and population studies. Mt genome sequences are not only more informative than shorter sequences of individual genes, but also provide sets of genome-level characters, such as the relative position of different genes, RNA secondary structures and modes of control of replication and transcription [1–4]. For the past two decades, mtDNA has been widely regarded as the molecular marker of choice for the phylogenetic analysis in metazoans because of its abundance in animal tissues, the small genome size, faster rate of evolution, low or absence of sequence recombination, and evolutionary conserved gene products [5,6], although the applicability of mt genomes as a marker of deeper divergences or highly divergent lineages is still controversial [7,8]. It is pertinent that the ideal molecular systematic approach would include both nuclear and organellar DNA such as mtDNA markers [9].

The suborder Heteroptera (true bugs) contains over 40,000 species, and majority of the agriculturally important true bugs are the group of phytophagous species attacking cultivated crops. The

haematophagous assassin bug *Triatoma dimidiata*, a representative of Triatominae (a subfamily of Reduviidae), is the most important vector of Chagas disease in humans [10,11]. Relatively few cladistic analyses have addressed relationships among the seven infraorders of Heteroptera during the past 25 years and the hypotheses on infraordinal relationships conflict on crucial points [12]. For example, what is the basal-most sister-group of the majority of Heteroptera - the Enicocephalomorpha (orthodoxy) or Nepomorpha [13]? Mt genome sequences provide a novel insight into the infraordinal relationships of Heteroptera, although the applicability remains to be elucidated. At present, the complete or nearly complete mt genomes of 32 species of heteropterans are available at NCBI (as of April 15, 2011; Table S1). Among these, 15 belong to Pentatomomorpha, nine belong to Nepomorpha, four belong to Cimicomorpha, two belong to Gerromorpha, and two belong to Leptopodomorpha [11,14–16]. Most of the submitted sequences are typically a small double-stranded circular molecule of 14–18 kb in length and contain 13 protein-coding genes (PCGs), two rRNA genes, 22 tRNA genes and a control region (CR). The control region is mostly AT-rich and fulfils a role in the initiation of replication and transcription [17,18]. To date, mt genome sequences of Enicoce-

phalomorpha and Dipsocoromorpha have not been reported. This lack of information impedes our ability to trace the evolution of the basal groups of Heteroptera based on mt genomes.

Enicocephalomorpha, or unique-headed bugs, are a relatively small group of true bugs [19–21], the only ones that engage in nuptial swarming among Heteroptera. They comprise two families, Aenictopecheidae and Enicocephalidae, which include 22 and 322 valid species, respectively, although hundreds of species remain undescribed [22]. Enicocephalomorpha was at one time placed in the Reduivoidea [23], but is now considered the putative sister group to all remaining Heteroptera [12,20,24–26].

In this paper, we present the complete mt genome of a representative species from the unique-headed bug, *Stenopirates* sp. This is the first species from the Enicocephalomorpha for which the entire mt genome has been sequenced, and for the first time, we report the rearrangement of protein-coding genes in a Heteroptera mt genome. We also discuss architecture of *Stenopirates* sp. mt genome and analyze the RNA secondary structure across the heteropterans. Finally, results from phylogenomic analysis shed lights on the phylogenetic relationship of Enicocephalomorpha among heteropterans.

## Results and Discussion

### Genome organization

The complete mt genome of *Stenopirates* sp. is a typical circular DNA molecule of 15,384 bp in length (GenBank accession

no. JN100019; Figure 1). This genome is a medium level of true bug mt genome size, ranging from 14,935 bp to 17,191 bp [14]. Within true bug mt genomes, the length variation was minimal in PCGs, tRNAs, the large and small rRNA subunits (*rrnL* and *rrnS*), but very different in the putative control region (Figure 2; Table S2). The mt genome of *Stenopirates* sp. contains 37 genes in total (13 PCGs, 22 tRNA genes, and two rRNA genes) which are typically present in metazoan mt genomes [17]. Twenty-three genes were transcribed on the majority strand (J-strand), whereas the others were oriented on the minority strand (N-strand). Gene overlaps were found at 17 gene junctions and involved a total of 59 bp; the longest overlap (11 bp) existed between *atp6* and *cox3*. In addition to the large non-coding region, several small non-coding intergenic spacers were present in the *Stenopirates* sp. mt genome and were spread over six positions, ranging in size from 1 to 67 bp (Table S3).

The gene order of the *Stenopirates* sp. mt genome differs largely from those of all other analyzed insect species. Compared to *Drosophila yakuba*, which is considered the representative ground pattern for insect mt genomes [27], 30 of the 38 gene boundaries in *D. yakuba* were conserved in *Stenopirates* sp. The most striking features were the inversion of two tRNA genes (*trnT* and *trnP*) and translocations of five gene clusters (*trnT-trnP-nad6*, *cytB-trnS2*, *nad1-trnL2*, *rrnL-trnV-rrnS* and *CR*) between *nad4L* and *trnI* (Figure 3).

The complete or nearly complete mt genomes of 32 species of Heteroptera have been sequenced and exhibit highly conserved gene order. The mt genomes of three Pentatomomorpha species

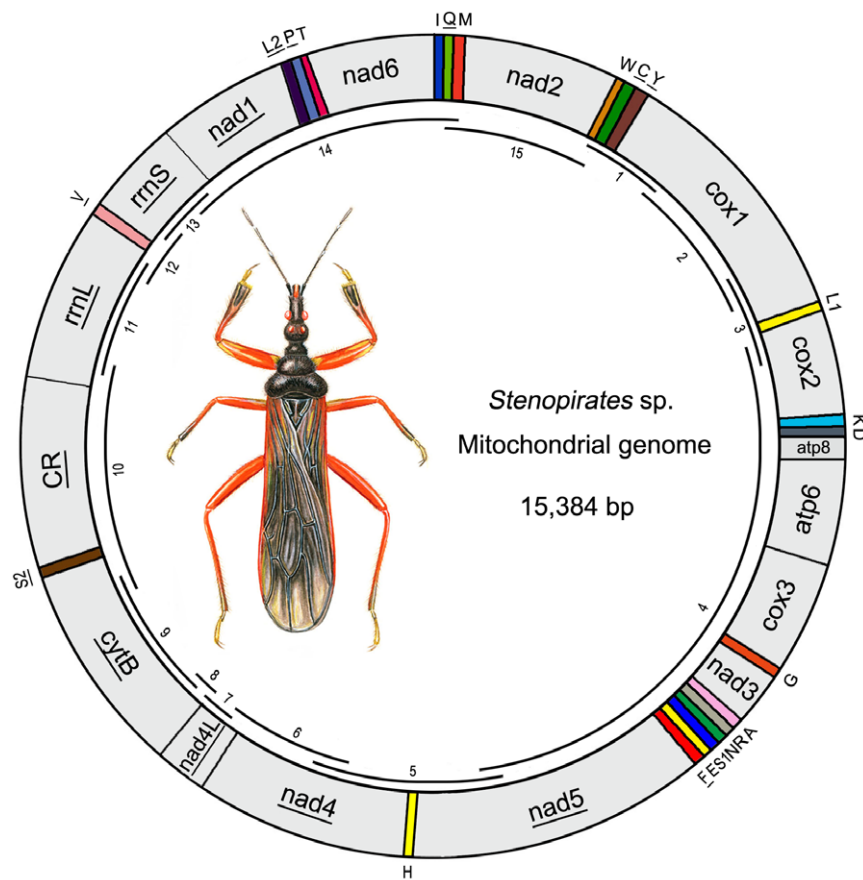

**Figure 1. Mitochondrial map of *Stenopirates* sp.** The tRNAs are denoted by the color blocks and are labelled according to the IUPACIUB single-letter amino acid codes. Gene name without underline indicates the direction of transcription from left to right, and with underline indicates right to left. Overlapping lines within the circle denote PCR fragments amplified used for cloning and sequencing.  
doi:10.1371/journal.pone.0029419.g001

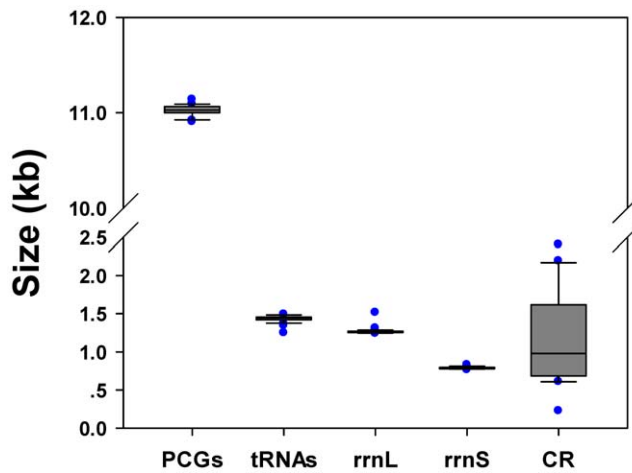

**Figure 2. The size of PCGs, *rrrL*, *rrrS*, and CR, respectively, among sequenced true bug mt genomes.** Lower horizontal bar, non-outlier smallest observation; lower edge of rectangle, 25 percentile; central bar within rectangle, median; upper edge of rectangle, 75 percentile; upper horizontal bar, non-outlier largest observation; blue circle, outlier.

doi:10.1371/journal.pone.0029419.g002

present gene rearrangements in the inversion of tRNA genes [14]. Two species in the superfamily Pyrrhocoroidea share the same gene order with the inversion of *tmT* and *tmP*. Two tRNA genes (*tmI* and *tmQ*) are inverted in the flat bug *Neuroctenus parus*. Rearrangements of the mt genome are relatively rare events at the evolutionary scale, and, therefore, provide a powerful tool to delimit deep divergences among some metazoan lineages [28]. In comparison to *Stenopirates* sp., rearrangements in other true bugs seem to occur independently. These results suggest that mt gene orders might lack of resolution to deduce phylogenetic relationships among infraorders within Heteroptera, although it has been used extensively to elucidate phylogenetic relations at the superfamily level [29,30].

### Base composition and codon usage

As is the case in other heteropteran mt genome sequences, the nucleotide composition of the *Stenopirates* sp. mt genome was also

biased toward A and T (J-strand: A = 43.9%, T = 38.6%, G = 7.5%, C = 10.0%; Table S4). The overall AT content (82.5%) of *Stenopirates* sp. was the highest and much higher than the average AT content of heteropteran mt genomes (Figure 4).

Metazoan mt genomes usually present a clear strand bias in nucleotide composition [31,32], and the strand bias can be measured as AT- and GC-skews [33]. A comparative analysis of A+T% vs AT-skew and G+C% vs GC-skew across all available mt genomes of true bugs is shown in Figure 4. The average AT-skew of true bug mt genomes was 0.15, ranging from 0.04 in *Hydaropsis longirostris* to 0.23 in *Leptopus* sp., whereas the *Stenopirates* sp. mt genome exhibited a slight AT-skew (0.06) (Table S4). The average GC-skew of true bug mt genomes was  $-0.18$ , ranging from  $-0.04$  in *Yemmalysus parallelus* to  $-0.27$  in *Triatoma dimidiata*, and the *Stenopirates* sp. mt genome exhibited a marked GC-skew ( $-0.14$ ) (Table S4). AT- and GC-skews of true bug mt genomes are consistent compared to the usual strand biases of metazoan mtDNA (positive AT-skew and negative GC-skew for the J-strand).

The reversal of strand asymmetry over the entire mt genome was found to have accelerated gene rearrangement rates [34] and was caused by inversion of replication origin [35]. However, species that have accelerated gene rearrangement rates do not always show a reversal of strand asymmetry, e.g., three *Nasonia* species (Insecta: Hymenoptera) [36], *Thrips imagines* (Insecta: Thysanoptera) [37] and *Stenopirates* sp. in this paper. Therefore, the mechanism of gene rearrangement also needs more in-depth study.

The genome-wide bias toward AT was well documented in the codon usage (Table S5). At the third codon position, A or T were overwhelmingly overrepresented compared to G or C. The overall pattern was very similar among the true bugs, with similar frequency of occurrences of various codons within a single codon family. There was a strong bias toward AT-rich codons with the six most prevalent codons in *Stenopirates* sp., as in order, TTA-Leu (12.76%), ATT-Ile (11.86%), ATA-Met (10.75%), TTT-Phe (9.93%), AAT-Asn (6.72%) and TAT-Tyr (4.49%) (Table S5).

### Protein-coding genes

The total length of all 13 PCGs was 11,056 bp, and accounted for 71.87% of the entire length of *Stenopirates* sp. mt genome. The overall AT content of PCGs was 82.05%, ranging from 74.0% (*cox1*) to 90.4% (*atp8*). Start and stop codons were determined based on alignments with the corresponding genes of other true

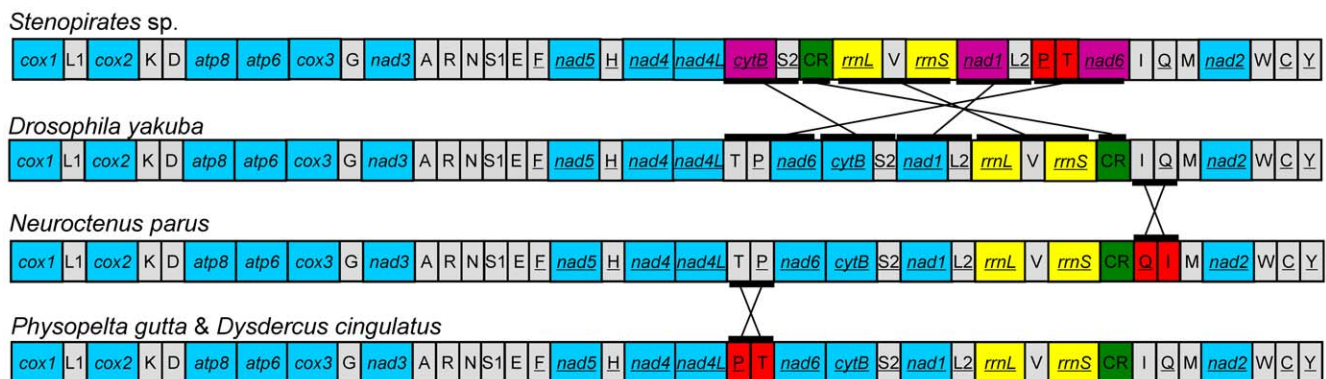

**Figure 3. Gene rearrangement of the *Stenopirates* sp. mt genome.** Only protein-coding genes (blue), ribosomal RNA genes (yellow) and control region (green) are marked. Blue boxes represent protein-coding genes with the same relative position as in the insect ground pattern, *Drosophila yakuba*; purple boxes and horizontal lines represent gene clusters that changed positions relative to *D. yakuba*; red boxes represent inversions of tRNAs. tRNA genes are abbreviated using the one-letter amino acid code, with L1 = CUN; L2 = UUR; S1 = AGN; S2 = UCN. All genes are transcribed from left to right except those underlined to indicate an opposite transcriptional orientation.

doi:10.1371/journal.pone.0029419.g003

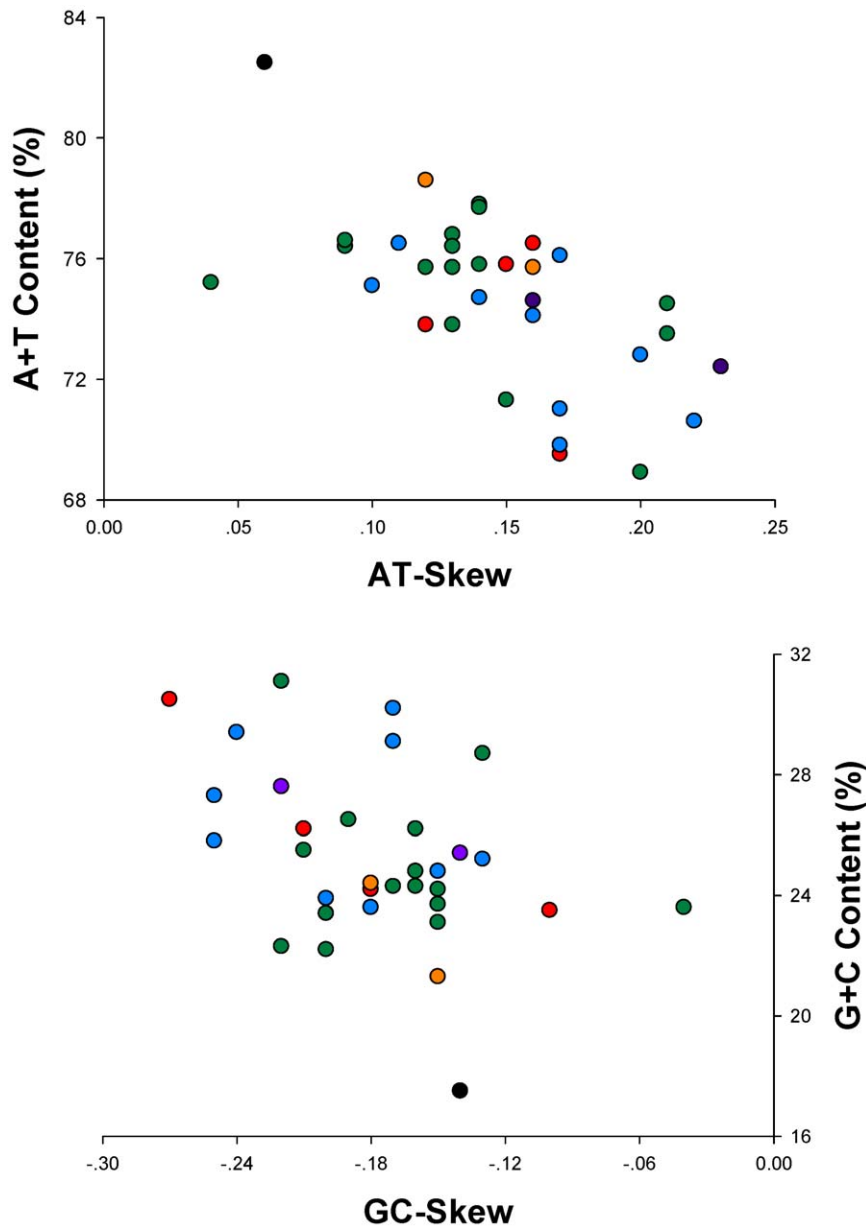

**Figure 4. AT% vs AT-Skew and GC% vs GC-Skew in true bug mt genomes.** Measured in bp percentage (Y-axis) and level of nucleotide skew (X-axis). Values are calculated on J-strands for full length mt genomes. Green circle, Pentatomomorpha; blue circle, Nepomorpha; red circle, Cimicomorpha; yellow circle, Gerromorpha; purple circle, Leptopodomorpha; black circle, Enicocephalomorpha (*Stenopirates* sp.). doi:10.1371/journal.pone.0029419.g004

bugs (Table S3). Five genes (*atp6*, *cox3*, *nad4*, *cytB*, *nad1*) used the standard ATG start codon, four genes (*nad2*, *atp8*, *nad4L*, *nad6*) started with ATA and three genes (*cox2*, *nad3*, *nad5*) initiated with ATT. *Cox1* most likely started with codon TTG. Nine genes employ a complete translation termination codon, either TAG (*nad3*, *cytB*) or TAA (*nad2*, *cox1*, *atp8*, *atp6*, *nad4L*, *nad1*, *nad6*), whereas the remaining four have incomplete stop codons T. The presence of an incomplete stop codon is common in metazoan mt genomes [17] and these truncated stop codons are presumed to be completed via post-transcriptional polyadenylation [38].

The rate of non-synonymous substitutions (Ka), the rate of synonymous substitutions (Ks), and the ratio of Ka/Ks were calculated for each PCG, respectively. In this respect, *atp8* showed the highest evolutionary rates, followed by *nad2*, while

*cox1* appeared to be the lowest (Figure 5). Notably, the ratio of Ka/Ks for each and every PCG was below 1, indicating that these genes are evolving under the purifying selection [39,40]. Furthermore, a negative correlation was observed between the Ka/Ks and the GC content of each PCG ( $R = -0.916$ ,  $P < 0.01$ ) (Table S6), which indicate that the variation of GC content probably causes the different evolutionary patterns among genes [14].

#### Transfer RNAs

The entire complement of 22 tRNAs typical of arthropod mt genomes was found in *Stenopirates* sp. and schematic drawings of their respective secondary structures are shown in Figure 6. Most of the tRNAs could be folded as classic clover-leaf structures, with

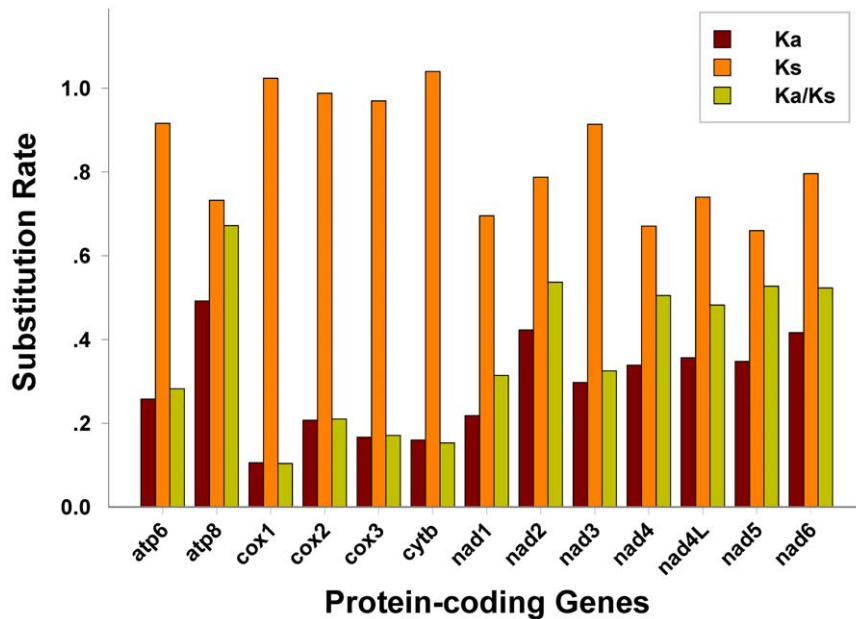

**Figure 5. Evolutionary rates of true bug mt genomes.** The rate of non-synonymous substitutions (Ka), the rate of synonymous substitutions (Ks) and the ratio of the rate of non-synonymous substitutions to the rate of synonymous substitutions (Ka/Ks) for each PCG. doi:10.1371/journal.pone.0029419.g005

the exception of *tmS1*, in which its DHU arm simply formed a loop. This phenomenon is a common theme in the true bug mt genomes. The aberrant tRNAs possess non-Watson-Crick matches, aberrant loops, or extremely short arms are common in metazoan mt genomes [17]. Whether or not the aberrant tRNAs lose their respective functions is still unknown, however, a post-transcriptional RNA editing mechanism has been proposed to sustain functions for these modified tRNAs [41,42].

### Ribosomal RNAs

The ends of rRNA genes are impossible to be precisely determined by DNA sequencing alone, so they are assumed to extend to the boundaries of flanking genes [43,44]. The *srRNA* was assumed to fill up the blanks between *tRNA-V* and *nad1*. For the boundary between the *lrRNA* gene and the non-coding putative control region, alignments with homologous sequences in other heteropteran mt genomes were applied to determine the 3'-end of the gene [11,14–16]. The length of *mlL* and *rmS* of *Stenopirates* sp. was determined to be 1,245 bp and 829 bp, respectively.

Both *mlL* and *rmS* are incongruent with the secondary structure models proposed for other insects [45–48]. The secondary structure of *Stenopirates* sp. *mlL* consisted of six structural domains (domain III is absent in arthropods) (Figure 7). Among sequenced true bugs, the sequence variations were too high in some regions for meaningful structural comparisons. Overall, the 5' and 3' ends, some helices (H183, H589, H687, H736, H837, H991, H1196, H1648, H1792, H2077, H2520), and domain VI were the most variable regions. Domains IV and V were more conserved. The secondary structure of *rmS* contained three domains (Figure 8). Conservative sites were mainly in domain III and some helices (loops of H673, H769 and H889) in domain II.

### Non-coding regions

The largest non-coding region (765 bp) was flanked by *tmS2* and *mlL* in the *Stenopirates* sp. mt genome. It was highly enriched in AT (74.9%) and could form stable stem-loop secondary structures.

Based on these features, it possibly functions as a control region [17,49].

Based on the sequence pattern, the control region could be subdivided into five parts (Figure 9). The first region (10,779–10,807) was a 29 bp leading sequence enriched in AT. The second region (10,808–10,830) included the 9 bp poly-C and 14 bp poly-G. The poly-G has been reported in assassin bug *Agriosphodrus dohmi* (referred as G element) [50], and triatomine bugs *Rhodnius prolixus* and *Triatoma dimidiata* (referred as Gs) [11], and some dipterans (referred as G islands) [48]. The possible involvement of this unique motif in insect replication and transcription initiation is one topic for the future research [51–53]. The third region (10,952–11,392) contained five (I–V) tandem repeats including two (I & III) 80 bp, one (V) 52 bp (a partial copy of the anterior repeat unit), and two (II & IV) repeats (with substitute of few nucleotides). The maximum size difference found in the control regions across all sequenced true bug mt genomes was 2,756 bp, indicating that strong size variation among true bug mt genomes is significantly correlated to the control regions (Figure 2). This result is consistent with previous findings from other insects [14,51,54]. In fact, the control region has been identified as the source of size variation in the entire mt genome, usually due to the presence of a variable copy number of repetitive elements [49]. Repeated sequences are common in the control region for most insects, and length variations due to the various numbers of repeats are not without precedent [11]. Consequently, analysis of the repeat units among individuals from different geographical locations may shed light on the geographical structuring and phylogenetic relationships of species. The fact that tandem repeats are non-conserved among these heteropteran mt genomes indicates a lack of a functional role. Replication slippage is regarded as a dominant mechanism to account for the existence of tandem repeats [55,56].

The fourth region (10,831–10,951 & 11,393–11,439) was near the tandem repeat region, and stem-loop structures which may be involved in the initiation of the replication of animal mtDNA [57] could be folded (Figure 10A), but none of these structures had

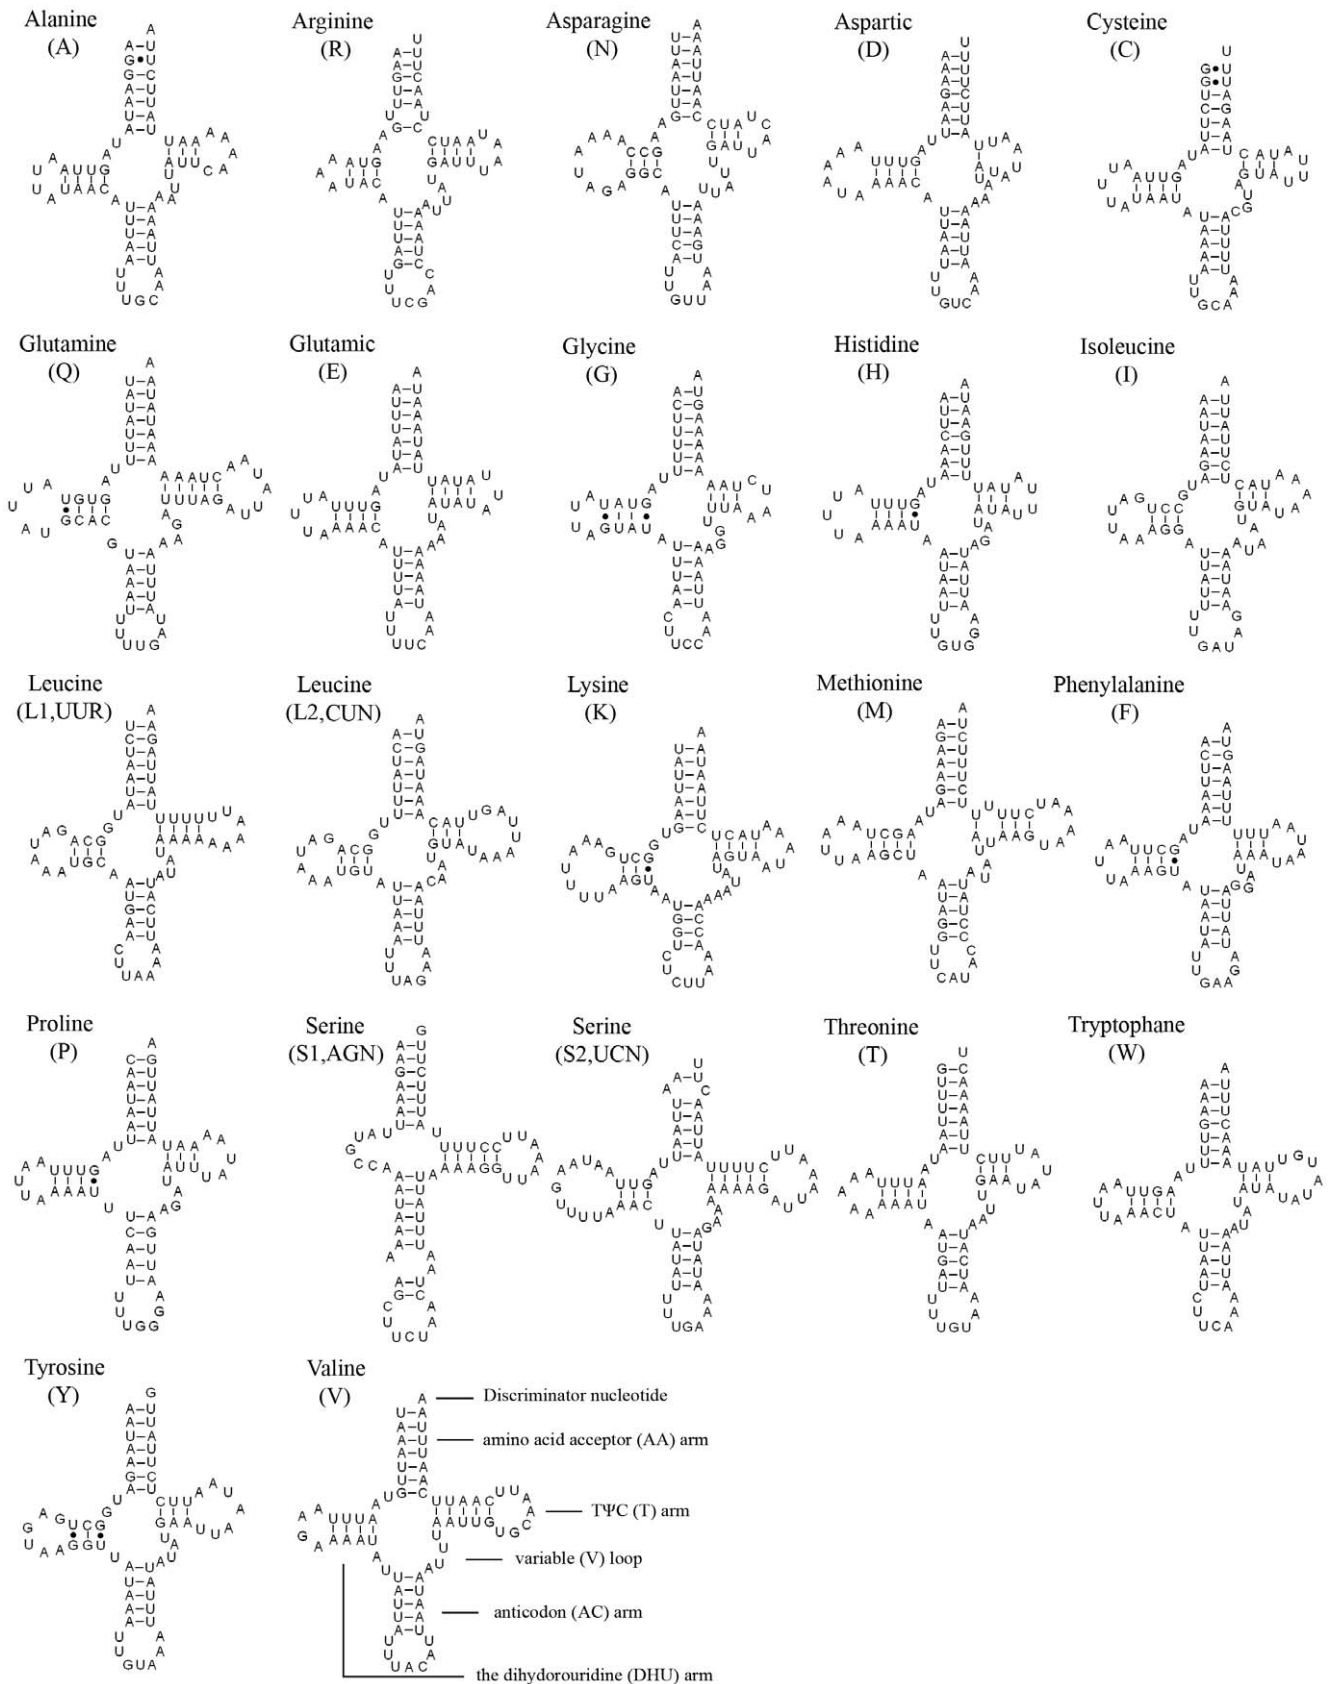

**Figure 6. Inferred secondary structure of 22 tRNAs of *Stenopirates* sp.** The tRNAs are labeled with the abbreviations of their corresponding amino acids. Inferred Watson-Crick bonds are illustrated by lines, whereas GU bonds are illustrated by dots.  
 doi:10.1371/journal.pone.0029419.g006

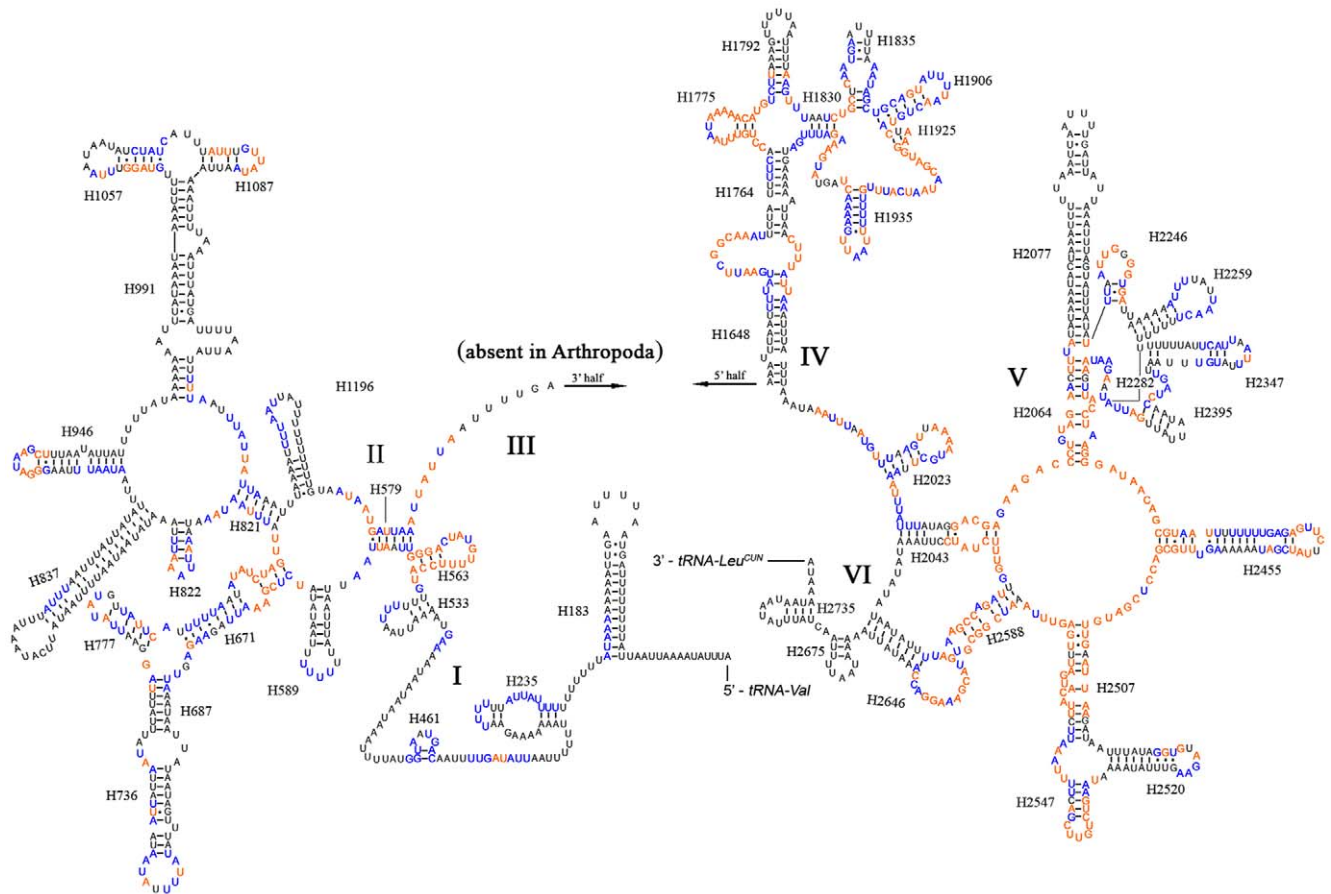

**Figure 7. Predicted secondary structure of the *rrnL* gene in *Stenopirates* sp.** The nucleotides showing 100% identities among true bugs are marked with orange color, and more than or equal to 75% identities are marked with blue color. Roman numerals denote the conserved domain structure. Inferred Watson-Crick bonds are illustrated by lines, GU bonds by dots.  
doi:10.1371/journal.pone.0029419.g007

flanking sequences similar to those that are conserved in the control region of the mt genomes of insects [58]. The fifth region (11,440–11,543) contained five CTTT-repeats, 31 CT-repeats and 22 AT-repeats. This domain can be considered a microsatellite [59]. In arthropod mtDNA such microsatellites are rare and only been reported for butterflies [47], the Asian arowana, *Scleropages formosus* [60], and a house dust mite, *Dermatophagoides pteronyssinus* [58]. This is remarkable because a mt microsatellite has not been reported for any heteropteran species. As described previously, four other stretches of non-coding nucleotides were found outside the control region. These short sequences can fold into stable stem-loop structures (Figure 10B & C) which may function as splicing recognition sites during processing of the transcripts [61].

### Phylogenetic analysis

Phylogenetic analyses were carried out using nucleotide sequences of 13 mt PCGs from 31 heteropteran species and 4 outgroup hemipteran insect species (*Pachypsysylla venusta* [30], *Acyrtosiphon pisum* [62], *Sivaloka damnosa* [63] and *Lycorma delicatula* [16]). BI and ML analyses generated identical tree topologies (Figure 11).

The seven-infraorder classification of Heteroptera has been accepted by most researchers [20,26], however phylogenetic relationships among infraorders are still controversial [13,16,20,26,64–66]. The major problem is the basalmost sister-

group of the majority of Heteroptera, the Enicocephalomorpha (orthodoxy) or Nepomorpha [13].

In the present study, the sister-relationship within the individual infraorders (as shown in Figure 11) are supported for the Pentatomomorpha (14 taxa), Nepomorpha (8 taxa), Leptopodomorpha (2 taxa) and Gerromorpha (2 taxa) by BI and ML analyses. In addition, both ML and BI analyses are highly supportive of the contention that *Stenopirates* sp. (Enicocephalomorpha) is the sister group to all the remaining Heteroptera [26,67].

Within Cimicomorpha, Reduviidae was paraphyletic with respect to Anthocoridae and Miridae in our trees, and this is largely incongruent with previous phylogenetic works [65,68,69]. The mt genome data in this study, however, may be limited to resolve the phylogeny of Cimicomorpha, and increased taxon sampling will be required to resolve this problem.

The ability of mt genome data to resolve infraordinal relationships of Heteroptera has not been fully evaluated. This study provides the initial evidence for the feasibility of using mt genome data to resolve infraordinal relationships of Heteroptera; however, the prerequisite is to ensure the integrity and representative of the infraorder-level taxa.

Future directions should focus on the following problems raised in the modern literature: (a) Are Dipsocoromorpha monophyletic and sister to the rest of Heteroptera (orthodoxy) or are they formed by two distinct clades with uncertain relationships (Štys, *in prep.*)?

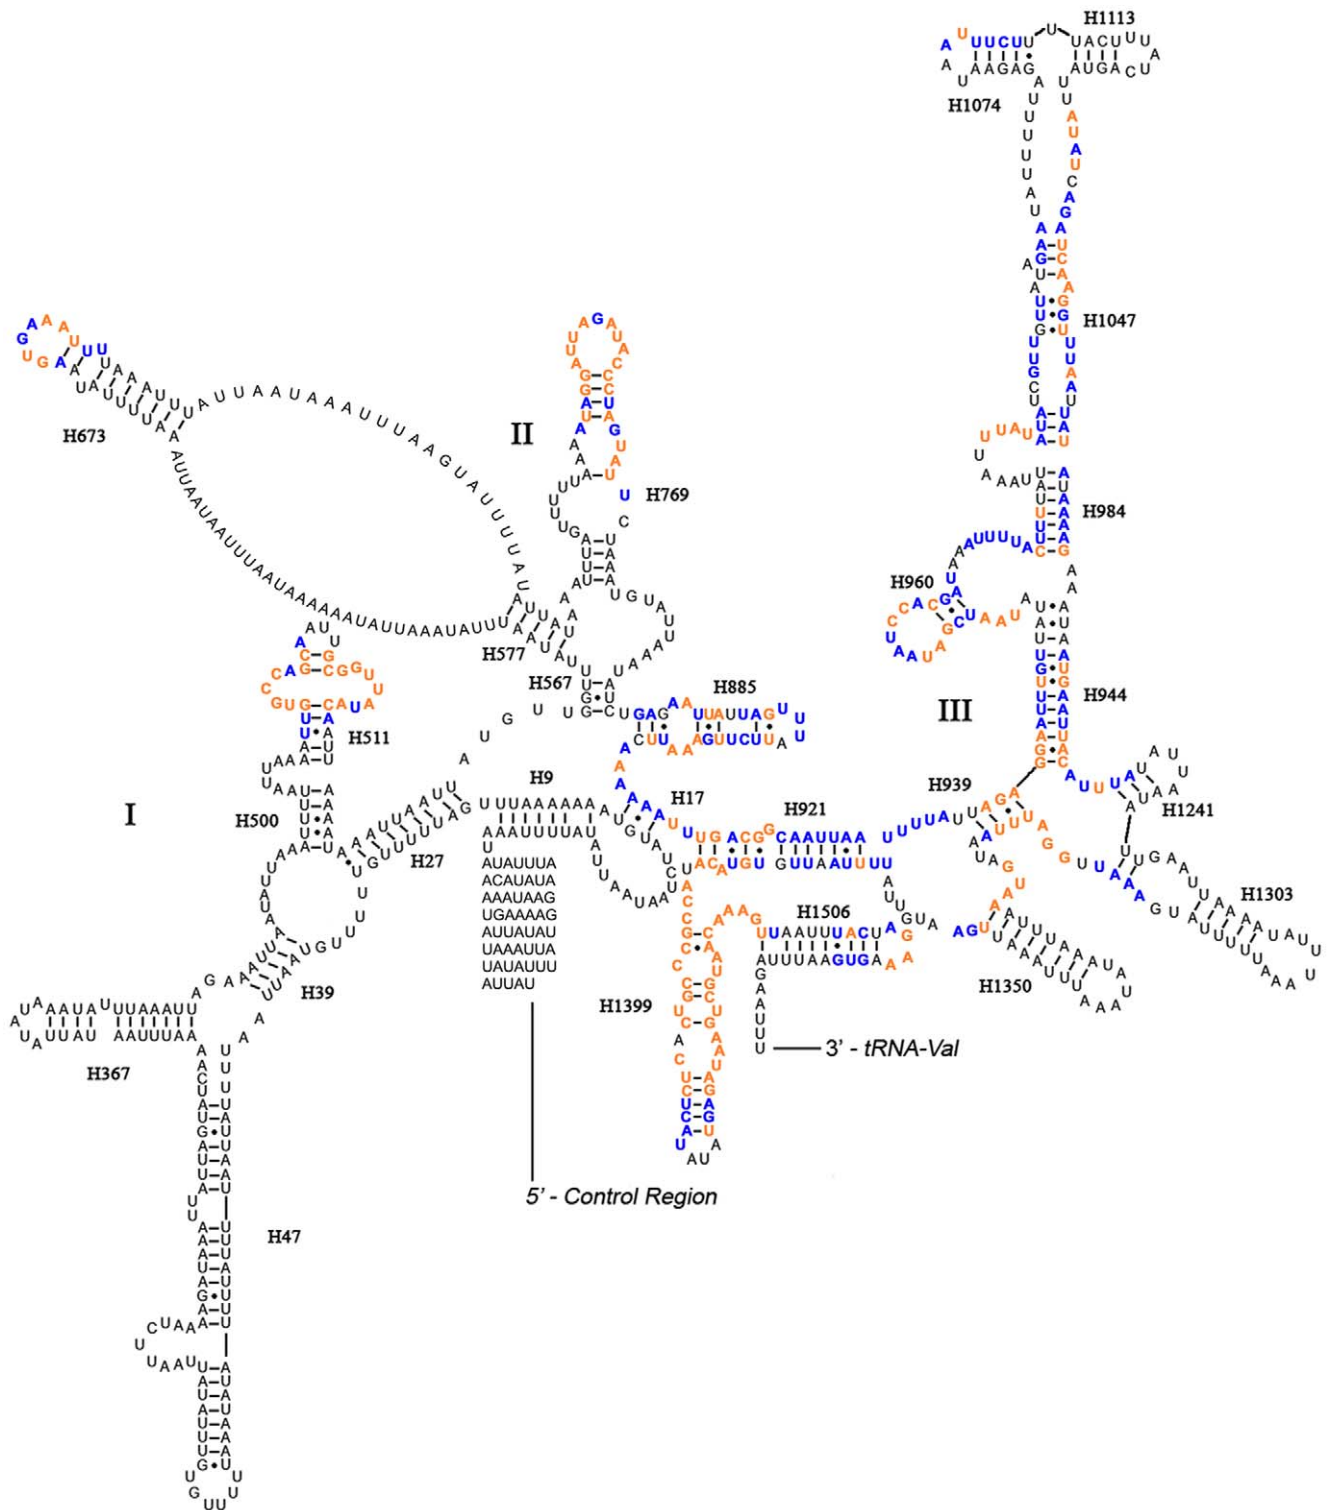

**Figure 8. Predicted secondary structure of the *rns* gene in *Stenopirates* sp.** The nucleotides showing 100% identities among true bugs are marked with orange color, and  $\geq 75\%$  identities are marked with blue color. Roman numerals denote the conserved domain structure. Inferred Watson-Crick bonds are illustrated by lines, GU bonds by dots.  
doi:10.1371/journal.pone.0029419.g008

(b) Are Nepomorpha monophyletic (orthodoxy) or should the Pleomorpha be excluded and its origin sought for elsewhere [16]?  
(c) Are some “Thaumastocoridae” pentatomomorphans and others cimicimorphans [65]? (d) Are the Pentatomomorpha

monophyletic (orthodoxy) or should the Aradimorpha be excluded and its origin be sought elsewhere [66]? and (e) What is the mutual relationship of Nepomorpha (*s. lat.*), Leptopodomorpha, and the truly terrestrial true bugs?



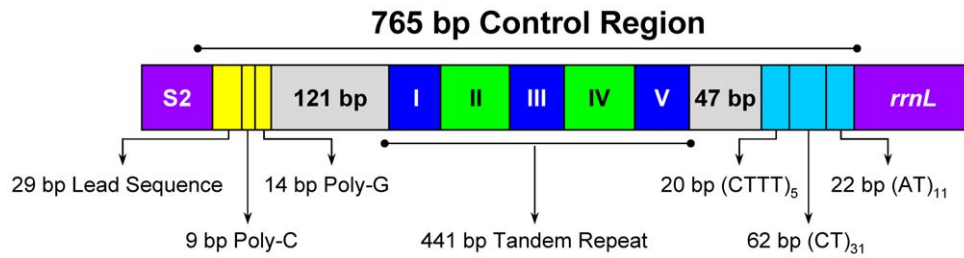

**Figure 9. Organization of the mitochondrial control region of *Stenopirates* sp.** The control region flanking genes *trnS2* (S2) and *rrnL* are represented in purple boxes. The blue and green boxes with roman numerals indicate the tandem repeat region; grey boxes represent the stem-loop region.

doi:10.1371/journal.pone.0029419.g009

### Summary

This is the first description of the complete mt genome of a species belonging to Enicocephalomorpha, an infraorder within Heteroptera. The overall AT content of *Stenopirates* sp. is the highest among sequenced heteropteran mt genomes. Although the gene order of the *Stenopirates* sp. mt genome is extremely rearranged and represents a new pattern, rearrangements exhibit

relatively rare events and seem to occur independently within true bug mt genomes. Gene order comparison indicated that mt gene order seems less useful for deduction of phylogenetic relationships among infraorders of Heteroptera. Comparative analyses suggest that the gene size, gene content, and base composition are comparatively conserved among true bug mt genomes. PCGs exhibit a different nucleotide substitution pattern, negatively

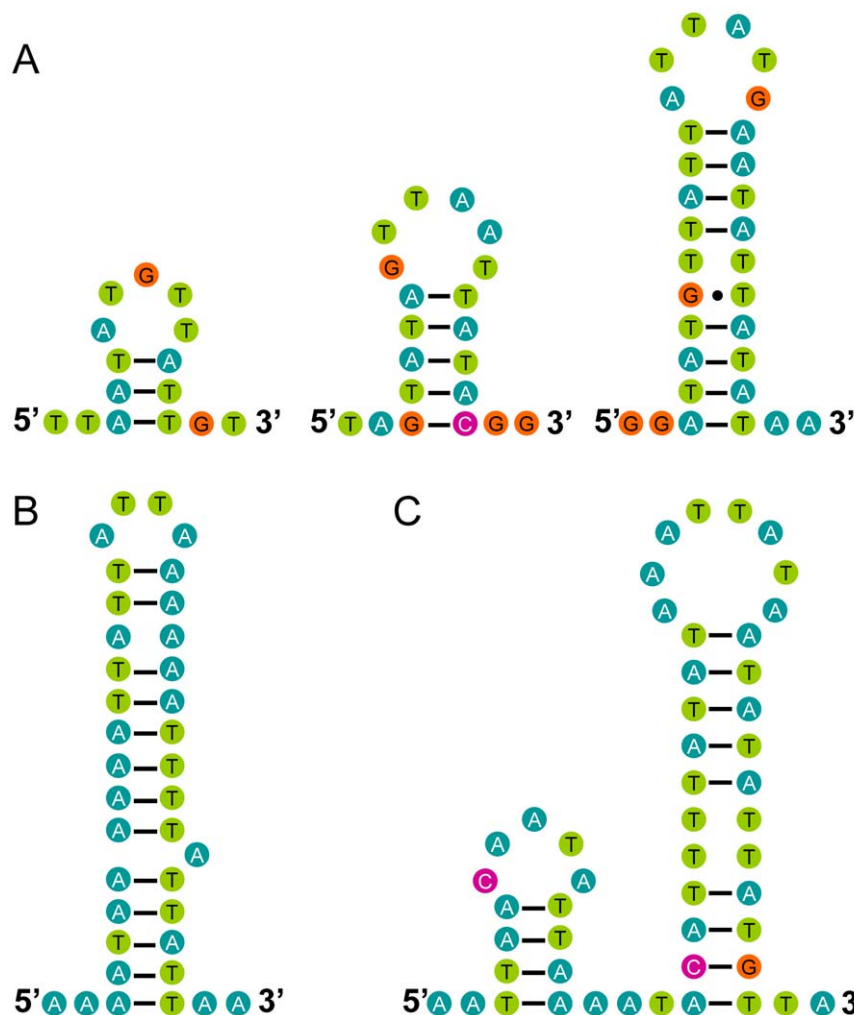

**Figure 10. Secondary structures of non-coding regions of the mt genome of *Stenopirates* sp.** Secondary structure of non-coding regions between (A) *trnS2* and *rrnL* (CR); (B) *cytB* and *trnS2*; (C) *trnT* and *nad6*. Inferred Watson-Crick bonds are illustrated by lines, GU bonds by dots.

doi:10.1371/journal.pone.0029419.g010

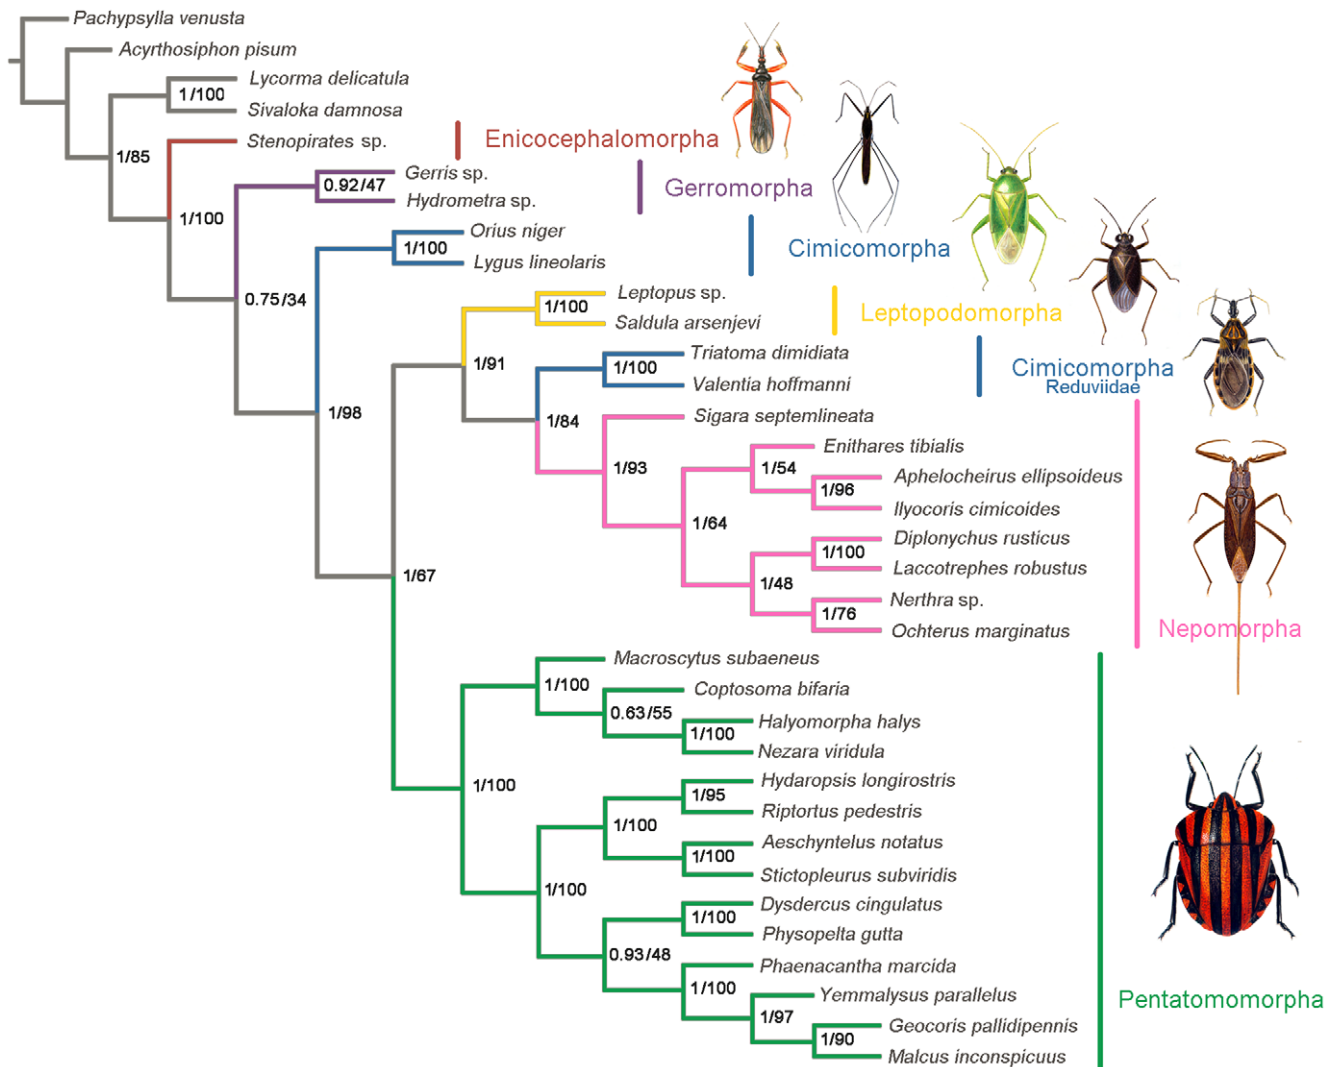

**Figure 11. Phylogenetic relationships among the sequenced true bugs.** Phylogenetic analyses were carried out for the 31 true bugs based on all 13 protein-coding genes from their respective mt genomes. The tree was rooted with four outgroups (*P. venusta*, *A. pisum*, *S. damnosa* and *L. delicatula*). Numbers at the nodes are Bayesian posterior probabilities (left) and ML bootstrap values (right). doi:10.1371/journal.pone.0029419.g011

correlated with GC content. True bugs mt *atp8* represents the highest evolutionary rate; whereas *cox1* appears to be the lowest. Most of the tRNAs can be folded as classic clover-leaf structures, with the exception of *tmSI*, in which its DHU arm simply forms a loop. In addition to stem-loop structures in the control region, another common feature is the existence of tandem repeats. Phylogenetic analysis using concatenated PCG sequences succeeded in corroborating hypothesis on sister-group relationship of Enicocephalomorpha to other heteropterans. The present study demonstrates the great effectiveness of mt genome for inferring phylogenetic relationships at the infraorder level.

## Materials and Methods

### Ethics statement

No specific permits were required for the insect collected for this study in Taiwan. The insect specimens were collected on the road side by sweeping. The field studies did not involve endangered or protected species. The species in the genus of *Stenopirates* are

common small insects and are not included in the “List of Protected Animals in China”.

### Samples and DNA extraction

The Oriental and East Palaearctic genus *Stenopirates* (Enicocephalinae: Enicocephalini) includes 8 described and about 20 undescribed species [19]. *Stenopirates* sp. adult males were collected from Pingdong, Taiwan, China, in May 2009. All collections were initially preserved in 95% ethanol in the field, and transferred to  $-20^{\circ}\text{C}$  for the long-term storage upon the arrival at the China Agricultural University (CAU). The genomic DNA was extracted from muscle tissues of a single *Stenopirates* sp. 's thorax using a CTAB-based protocol [70].

### PCR amplification and sequencing

The mt genome of *Stenopirates* sp. was generated by amplification of overlapping PCR fragments (Figure 1 and Table S7). Initially, eleven fragments were amplified using the universal primer sets [71]. Four perfectly matched primers (Table S7) were designed

based on the read of these short fragments for the secondary PCRs.

Short PCRs (<1.5 kb) were carried out using Qiagen Taq DNA polymerase (Qiagen, Beijing, China) with the following cycling conditions: 5 min at 94°C, followed by 35 cycles of 50 s at 94°C, 50 s at 48–55°C, 1–2 min at 72°C depending on the size of amplicons, and the subsequent final elongation step at 72°C for 10 min. Long PCRs (>1.5 kb) were performed using NEB Long Taq DNA polymerase (New England BioLabs, Ipswich, MA) under the following cycling conditions: 30 s at 95°C, followed by 40 cycles of 10 s at 95°C, 50 s at 48–55°C, 3–6 min at 68°C depending on the size of amplicons, and the final elongation step at 68°C for 10 min. The quality of PCR products were evaluated by spectrophotometry and agarose gel electrophoresis.

The PCR fragments were ligated into the pGEM-T Easy Vector (Promega) and resulting plasmid DNAs were isolated using the TIANprep Midi Plasmid Kit (Qiagen, Beijing, China). All fragments were sequenced in both directions using the BigDye Terminator Sequencing Kit (Applied Biosystems) and the ABI 3730XL Genetic Analyzer (PE Applied Biosystems, San Francisco, CA, USA) with two vector-specific primers and internal primers for primer walking.

### Annotation and bioinformatic analysis

The complete mt genome of *Stenopirates* sp. has been deposited in GenBank under accession number JN100019. Mt DNA sequences were proof-read and aligned into contigs in BioEdit v.7.0.5.3 [72]. PCGs and rRNA genes were identified based on sequence similarity with published insect mt sequences from public domains (e.g., GenBank).

The tRNA genes were identified by tRNAscan-SE Search Server v.1.21 [73] with default settings. Some tRNA genes that could not be determined by tRNAscan-SE were determined in the unannotated regions by sequence similarity to tRNAs of other heteropterans. The base composition, codon usage, and nucleotide substitution were analyzed with Mega 4.0 [74].

The software packages DnaSP 5.0 [75] was used to calculate the number of synonymous substitutions per synonymous site (Ks) and the number of nonsynonymous substitutions per nonsynonymous site (Ka) for each PCG.

### Construction of secondary structures of rRNAs and non-coding Regions

Secondary structures of the small and large subunits of rRNAs were inferred using models predicted for *Drosophila* [45], *Apis mellifera* [46], *Manduca sexta* [47] and *Ruspolia dubia* [48]. Stem-loops were named according to the convention of [46], as well as [47]. Regions lacking significant homology and other non-coding regions were folded using Mfold [76].

### Phylogenetic analysis

Phylogenetic analyses were performed based on the 31 complete or nearly complete mt genomes of true bugs from GenBank (Table S1). Two species from Sternorrhyncha and two species from “Auchenorrhyncha”: Fulgoromorpha were selected as outgroups. Based on an analysis of mt genomes of nine Nepomorpha and five other hemipterans, Pleidae were recovered as the sister group to Geocorisae + Leptopodomorpha + remaining Nepomorpha, and were suggested to be raised from a superfamily to the infraorder Plemorpha [13]. Similarly, the phylogenetic position of “Aradoid-

dea” or “Aradimorpha” was also the problem [68]. Since we didn’t add samples to solve these problems, *Paraplea frontalis* (Nepomorpha: Pleidae) and *Neuroctenus parvus* (Pentatomomorpha: Aradidae) were treated as *incertae sedis*. These two species were not included in the phylogenetic analyses to ensure the stability of the topology.

DNA alignment was inferred from the amino acid alignment of 13 PCGs using Clustal X [77] as implemented in the Mega 4.0 [74], which can translate between DNA and amino acid sequences within alignments. Alignments of individual genes were then concatenated excluding the stop codon. Model selection was based on Modeltest 3.7 [78] for nucleotide sequences. According to the Akaike information criterion, the GTR+I+G model was optimal for analysis with nucleotide alignments. MrBayes v.3.1.2 [79] and a PHYML online web server [80,81] were employed to reconstruct the phylogenetic trees. In Bayesian inference, two simultaneous runs of 3,000,000 generations were conducted. Each set was sampled every 200 generations with a burnin of 25% [16,54,82,83]. Trees inferred prior to stationarity were discarded as burnin, and the remaining trees were used to construct a 50% majority-rule consensus tree. In the ML analysis, the parameters were estimated during analysis and the node support values were assessed by bootstrap re-sampling (BP) [84] calculated using 100 replicates.

### Supporting Information

**Table S1 Summary of taxonomic groups used in this study.**

(DOCX)

**Table S2 The Size of PCGs, tRNAs, rrrnL, rrrnS, and CR, respectively, among sequenced true bug mt genomes.**

(DOCX)

**Table S3 Organization of *Stenopirates* sp. mt genome.**

(DOCX)

**Table S4 Base composition and strand bias in true bug mt genomes.**

(DOCX)

**Table S5 Codon usage of protein-coding genes in the *Stenopirates* sp. mt genome.**

(DOCX)

**Table S6 Different evolutionary patterns among protein-coding genes.**

(DOCX)

**Table S7 Primer sequences used in this study.**

(DOCX)

### Acknowledgments

Special thanks go to Drs. John J. Obrycki, Eric G. Chapman (University of Kentucky) and Shujuan Li (Purdue University) for their comments on an earlier draft of the paper.

### Author Contributions

Conceived and designed the experiments: H. Li WZC. Performed the experiments: H. Li. Analyzed the data: H. Li. Contributed reagents/materials/analysis tools: H. Li H. Liu AMS. Wrote the paper: H. Li XZ. Contributed intellectually during the design and implementation of this study, and during the writing of the manuscript: WZC XZ PŠ.

## References

- Dowton M, Castro LR, Austin AD (2002) Mitochondrial gene rearrangements as phylogenetic characters in the invertebrates: the examination of genome 'morphology'. *Invertebr Syst* 16: 345–356.
- Boore JL, Macey JR, Medina M (2005) Sequencing and comparing whole mitochondrial genomes of animals. In *Molecular Evolution: Producing the Biochemical Data, Part B Volume 395*. San Diego: Elsevier Academic Press Inc. pp 311–348.
- Boore JL (2006) The use of genome-level characters for phylogenetic reconstruction. *Trends Ecol Evol* 21: 439–446.
- Masta SE, Boore JL (2008) Parallel evolution of truncated transfer RNA genes in arachnid mitochondrial genomes. *Mol Biol Evol* 25: 949–959.
- Lin CP, Danforth BN (2004) How do insect nuclear and mitochondrial gene substitution patterns differ? Insights from Bayesian analyses of combined datasets. *Mol Phylogenet Evol* 30: 686–702.
- Gissi C, Iannelli F, Pesole G (2008) Evolution of the mitochondrial genome of Metazoa as exemplified by comparison of congeneric species. *Heredity* 101: 301–320.
- Curole JP, Kocher TD (1999) Mitogenomics: digging deeper with complete mitochondrial genomes. *Trends Ecol Evol* 14: 394–398.
- Cameron SL, Miller KB, D'Haese CA, Whiting MF, Barker SC (2004) Mitochondrial genome data alone are not enough to unambiguously resolve the relationships of Entognatha, Insecta and Crustacea *sensu lato* (Arthropoda). *Cladistics* 20: 534–557.
- Rubinoff D, Holland BS (2005) Between two extremes: mitochondrial DNA is neither the Panacea nor the Nemesis of phylogenetic and taxonomic inference. *Syst Biol* 54: 952–961.
- Lent H, Wygodzinsky P (1979) Revision of the Triatominae (Hemiptera, Reduviidae), and their significance as vectors of Chagas' disease. *Bull Am Mus Nat Hist* 163: 125–520.
- Dotson EM, Beard CB (2001) Sequence and organization of the mitochondrial genome of the Chagas disease vector, *Triatoma dimidiata*. *Insect Mol Biol* 10: 205–215.
- Weirauch C, Schuh RT (2011) Systematics and evolution of Heteroptera: 25 years of progress. *Annu Rev Entomol* 56: 487–510.
- Mahner M (1993) Systema cryptoceratorum phylogenticum (Insecta, Heteroptera). *Zoologica* 143: ix + 302.
- Hua JM, Li M, Dong PZ, Cui Y, Xie Q, et al. (2008) Comparative and phylogenomic studies on the mitochondrial genomes of Pentatomomorpha (Insecta: Hemiptera: Heteroptera). *BMC Genomics* 9: 610.
- Lee W, Kang J, Jung C, Hoelmer K, Lee SH, et al. (2009) Complete mitochondrial genome of brown marmorated stink bug *Halyomorpha halys* (Hemiptera: Pentatomidae), and phylogenetic relationships of hemipteran suborders. *Mol Cells* 28: 155–165.
- Hua JM, Li M, Dong PZ, Cui Y, Xie Q, et al. (2009) Phylogenetic analysis of the true water bugs (Insecta: Hemiptera: Heteroptera: Nepomorpha): evidence from mitochondrial genomes. *BMC Evol Biol* 9: 134.
- Wolstenholme DR (1992) Animal mitochondrial DNA: structure and evolution. *Int Rev Cytol* 141: 173–216.
- Boore JL (1999) Animal mitochondrial genomes. *Nucleic Acids Res* 27: 1767–1780.
- Štys P (1995) Enicocephalomorpha. 67–73. In Schuh RT, Slater JA, eds. *True bugs of the world (Hemiptera: Heteroptera)*. Classification and natural history. Ithaca: Cornell University Press.
- Schuh RT, Slater JA (1995) *True bugs of the world (Hemiptera: Heteroptera)*. Classification and natural history. Ithaca: Cornell University Press. 336 p.
- Štys P (1989) Phylogenetic systematics of the most primitive true bugs (Heteroptera, Enicocephalomorpha, Diposcoromorpha). *Práce Slovenská entomologická spoločnosť SAV, Bratislava* 8: 69–85.
- Štys P (2008) Zoogeography of Enicocephalomorpha (Heteroptera). *Bull Insectol* 61: 137–138.
- Usinger RL (1943) A revised classification of the Reduivoidea with a new subfamily from South America (Hemiptera). *Ann Entomol Soc Am* 36: 602–617.
- Štys P (1984) Phylogeny and classification of lower Heteroptera. *Int Cong Entomol Proc* 17: 12.
- Štys P, Kerzhner I (1975) The rank and nomenclature of higher taxa in recent Heteroptera. *Acta Entomol Bohemoslov* 72: 65–79.
- Wheeler WC, Schuh RT, Bang R (1993) Cladistic relationships among higher groups of Heteroptera: congruence between morphological and molecular data sets. *Entomol Scand* 24: 121–137.
- Clary DO, Wolstenholme DR (1985) The mitochondrial DNA molecular of *Drosophila yakuba*: nucleotide sequence, gene organization and genetic code. *J Mol Evol* 22: 252–271.
- Boore JL, Brown WM (1998) Big trees from little genomes: mitochondrial gene order as a phylogenetic tool. *Curr Opin Genet Dev* 8: 668–674.
- Shao R, Campbell NJ, Schmidt ER, Barker SC (2001) Increased rate of gene rearrangement in the mitochondrial genomes of three orders of hemipteroid insects. *Mol Biol Evol* 18: 1828–1832.
- Thao ML, Baumann L, Baumann P (2004) Organization of the mitochondrial genomes of whiteflies, aphids, and psyllids (Hemiptera: Sternorrhyncha). *BMC Evol Biol* 4: 25.
- Hassanin A, Leger N, Deutsch J (2005) Evidence for multiple reversals of asymmetric mutational constraints during the evolution of the mitochondrial genome of Metazoa, and consequences for phylogenetic inferences. *Syst Biol* 54: 277–298.
- Hassanin A (2006) Phylogeny of Arthropoda inferred from mitochondrial sequences: Strategies for limiting the misleading effects of multiple changes in pattern and rates of substitution. *Mol Phylogenet Evol* 38: 100–116.
- Perna NT, Kocher TD (1995) Patterns of nucleotide composition at fourfold degenerate sites of animal mitochondrial genomes. *J Mol Evol* 41: 353–358.
- Cameron SL, Johnson KP, Whiting MF (2007) The mitochondrial genome of the screamer louse *Bothriometopus* (Phthiraptera: Ischnocera): effects of extensive gene rearrangements on the evolution of the genome. *J Mol Evol* 65: 589–604.
- Wei SJ, Shi M, Chen XX, Sharkey MJ, van Achterberg C, et al. (2010) New views on strand asymmetry in insect mitochondrial genomes. *PLoS ONE* 5: e12708.
- Oliveira DCSG, Rhitoban R, Lavrov DV, Werren JH (2008) Rapidly evolving mitochondrial genome and directional selection in mitochondrial genes in the parasitic wasp *Nasonia* (Hymenoptera: Pteromalidae). *Mol Biol Evol* 25: 2167–2180.
- Shao R, Barker SC (2003) The highly rearranged mitochondrial genome of the plague thrips, *Thrips imuginis* (Insecta: Thysanoptera): convergence of two novel gene boundaries and an extraordinary arrangement of rRNA genes. *Mol Biol Evol* 20: 362–370.
- Ojala D, Montoya J, Attardi G (1981) tRNA punctuation model of RNA processing in human mitochondria. *Nature* 290: 470–474.
- Roques S, Fox CJ, Villasana MI, Rico C (2006) The complete mitochondrial genome of the whiting, *Merlangius merlangus* and the haddock, *Melanogrammus aeglefinus*: a detailed genomic comparison among closely related species of the Gadidae family. *Gene* 383: 12–23.
- Yuan ML, Wei DD, Wang BJ, Dou W, Wang JJ (2010) The complete mitochondrial genome of the citrus red mite *Panonychus citri* (Acari: Tetranychidae): high genome rearrangement and extremely truncated tRNAs. *BMC Genomics* 11: 597.
- Masta SE, Boore JL (2004) The complete mitochondrial genome sequence of the spider *Habronattus oregonensis* reveals rearranged and extremely truncated tRNAs. *Mol Biol Evol* 21: 893.
- Lavrov DV, Brown WM, Boore JL (2000) A novel type of RNA editing occurs in the mitochondrial tRNAs of the centipede *Lithobius forficatus*. *Proc Natl Acad Sci USA* 97: 13738–13742.
- Boore JL (2001) Complete mitochondrial genome sequence of the polychaete annelid *Platynereis dumerilii*. *Mol Biol Evol* 18: 1413–1416.
- Boore JL (2006) The complete sequence of the mitochondrial genome of *Nautilus macromphalus* (Mollusca: Cephalopoda). *BMC Genomics* 7: 182.
- Cannone JJ, Subramanian S, Schnare MN, Collett JR, D'Souza LM, et al. (2002) The comparative RNA web (CRW) site: an online database of comparative sequence and structure information for ribosomal, intron, and other RNAs. *BMC Bioinformatics* 3: 15.
- Gillespie JJ, Johnston JS, Cannone JJ, Gutell RR (2006) Characteristics of the nuclear (18S, 5.8S, 28S and 5S) and mitochondrial (12S and 16S) rRNA genes of *Apis mellifera* (Insecta: Hymenoptera): Structure, organization and retrotransposable elements. *Insect Mol Biol* 15: 657–686.
- Cameron SL, Whiting MF (2008) The complete mitochondrial genome of the tobacco hornworm, *Manduca sexta* (Insecta: Lepidoptera: Sphingidae), and an examination of mitochondrial gene variability within butterflies and moths. *Gene* 408: 112–123.
- Zhou ZJ, Huang Y, Shi FM (2007) The mitochondrial genome of *Ruspolia dubia* (Orthoptera: Conocephalidae) contains a short A+T-rich region of 70 bp in length. *Genome* 50: 855–866.
- Zhang DX, Hewitt GM (1997) Insect mitochondrial control region: A review of its structure, evolution and usefulness in evolutionary studies. *Biochem Syst Ecol* 25: 99–120.
- Li H, Gao JY, Liu HY, Liu H, Liang AP, et al. (2011) The architecture and complete sequence of mitochondrial genome of an assassin bug *Agriosphodrus dohrmi* (Hemiptera: Reduviidae). *Int J Bio Sci* 7: 792–804.
- Oliveira MT, Barau JG, Junqueira AC, Feijão PC, Rosa AC, et al. (2008) Structure and evolution of the mitochondrial genomes of *Haematobia irritans* and *Stomoxys calcitrans*: The Muscidae (Diptera: Calypttratae) perspective. *Mol Phylogenet Evol* 48: 850–857.
- Saito S, Tamura K, Aotsuka T (2005) Replication origin of mitochondrial DNA in insects. *Genetics* 171: 1695–1705.
- Asin-Cayuela J, Dustafsson CM (2007) Mitochondrial transcription and its regulation in mammalian cells. *Trends Biochem Sci* 32: 111–117.
- Ma C, Liu C, Yang P, Kang L (2009) The complete mitochondrial genomes of two band-winged grasshoppers, *Gastrinargus marmoratus* and *Oedaleus asiaticus*. *BMC Genomics* 10: 156.
- Levinson G, Gutman GA (1987) Slipped-strand mispairing: a major mechanism for DNA sequence evolution. *Mol Biol Evol* 4: 203–221.
- Fumagalli L, Taberlet P, Favre L, Hausser J (1996) Origin and evolution of homologous repeated sequences in the mitochondrial DNA control region of shrews. *Mol Biol Evol* 13: 31–46.
- Crozier RH, Crozier YC (1993) The mitochondrial genome of the honeybee *Apis mellifera*: complete sequence and genome organization. *Genetics* 133: 97–117.

58. Wannas D, Thomas VL, Bartel V, Luc T (2009) The complete mitochondrial genome of the house dust mite *Dermatophagoides pteronyssinus* (Trouessart): a novel gene arrangement among arthropods. *BMC Genomics* 10: 107.
59. Goldstein DB, Schlotterer C (1999) Microsatellites: evolution and applications. USA: Oxford University Press. 352 p.
60. Yue GH, Liew WC, Orban L (2006) The complete mitochondrial genome of a basal teleost, the Asian arowana (*Scleropages formosus*, Osteoglossidae). *BMC Genomics* 7: 242.
61. He Y, Jones J, Armstrong M, Lamberti F, Moens M (2005) The mitochondrial genome of *Xiphinema americanum* sensu stricto (Nematoda: Enoplea): Considerable economization in the length and structural features of encoded genes. *J Mol Evol* 61: 819–833.
62. Barrett RJ, Crease TJ, Hebert PD, Via S (1994) Mitochondrial DNA diversity in the pea aphid *Acyrtosiphon pisum*. *Genome* 37: 858–865.
63. Song N, Liang AP, Ma C (2010) The complete mitochondrial genome sequence of the planthopper, *Sivaloka damnosus*. *J Insect Sci* 10: 76.
64. Schuh RT (1986) The influence of cladistics on the classification of the Heteroptera. *Annu Rev Entomol* 31: 67–93.
65. Schuh RT, Weirauch C, Wheeler WC (2009) Phylogenetic relationships within the Cimicomorpha (Hemiptera: Heteroptera): a total-evidence analysis. *Syst Entomol* 34: 15–48.
66. Sweet MH (2006) Justification for the Aradimorpha as an infraorder of the suborder Heteroptera (Hemiptera: Prosorrhyncha) with special reference to pregenital abdominal structure. *Denisia* 19: 225–248.
67. Xie Q, Tian Y, Zheng LY, Bu WJ (2008) 18S rRNA hyper-elongation and the phylogeny of Euhemiptera (Insecta: Hemiptera). *Mol Phylogenet Evol* 47: 463–471.
68. Schuh RT, Štys P (1991) Phylogenetic analysis of cimicomorphan family relationships (Heteroptera). *J New York Entomol Soc* 99: 98–350.
69. Tian Y, Zhu WB, Li M, Xie Q, Bu WJ (2008) Influence of data conflict and molecular phylogeny of major clades in cimicomorphan true bugs (Insecta: Hemiptera: Heteroptera). *Mol Phylogenet Evol* 47: 581–597.
70. Aljanabi SM, Martinez I (1997) Universal and rapid salt-extraction of high quality genomic DNA for PCR-based techniques. *Nucleic Acids Res* 25: 4692–4693.
71. Simon C, Buckley TR, Frati F, Stewart JB, Beckenbach AT (2006) Incorporating molecular evolution into phylogenetic analysis, and a new compilation of conserved polymerase chain reaction primers for animal mitochondrial DNA. *Annu Rev Ecol Evol Syst* 37: 545–579.
72. Hall TA (1999) BioEdit: a user-friendly biological sequence alignment editor and analysis program for Windows 95/98/NT. *Nucleic Acids Symp Ser* 41: 95–98.
73. Lowe TM, Eddy SR (1997) tRNAscan-SE: a program for improved detection of transfer RNA genes in genomic sequence. *Nucleic Acids Res* 25: 955–964.
74. Tamura K, Dudley J, Nei M, Kumar S (2007) MEGA4: molecular evolutionary genetics analysis (MEGA) software version 4.0. *Mol Biol Evol* 24: 1596–1599.
75. Librado P, Rozas J (2009) DnaSP v5: a software for comprehensive analysis of DNA polymorphism data. *Bioinformatics* 25: 1451–1452.
76. Zuker M (2003) Mfold web server for nucleic acid folding and hybridization prediction. *Nucleic Acids Res* 31: 3406–3415.
77. Thompson JD, Gibson TJ, Plewniak F, Jeanmougin F, Higgins DG (1997) The CLUSTAL\_X Windows interface: flexible strategies for multiple sequence alignment aided by quality analysis tools. *Nucleic Acids Res* 25: 4876–4882.
78. Posada D, Crandall KA (1998) MODELTEST: testing the model of DNA substitution. *Bioinformatics* 14: 817–818.
79. Ronquist F, Huelsenbeck JP (2003) MrBayes 3: Bayesian phylogenetic inference under mixed models. *Bioinformatics* 19: 1572–1574.
80. Guindon S, Gascuel O (2003) A simple, fast, and accurate algorithm to estimate large phylogenies by maximum likelihood. *Syst Biol* 52: 696–704.
81. Guindon S, Lethiec F, Duroux P, Gascuel O (2005) PHYML Online - a web server for fast maximum likelihood-based phylogenetic inference. *Nucleic Acids Res* 33: W557–559.
82. Wiegmann BW, MTrautwein MD, Winkler IS, Barr NB, Kim JW, et al. (2011) Episodic radiations in the fly tree of life. *Proc Natl Acad Sci USA* 108: 5690–5695.
83. Wei SJ, Shi M, Sharkey MJ, van Achtenberg C, Chen XX (2010) Comparative mitogenomics of Braconidae (Insecta: Hymenoptera) and the phylogenetic utility of mitochondrial genomes with special reference to Holometabolous insects. *BMC Genomics* 11: 371.
84. Felsenstein J (1985) Confidence limits on phylogenies: an approach using the bootstrap. *Evolution* 39: 783–791.
